# Supplementary material
Source: Springer Nature journal article supplement (https://www.springermedizin.de/resource/supplementary/13045_2011_171_MOESM11_ESM.pdf/9660806)

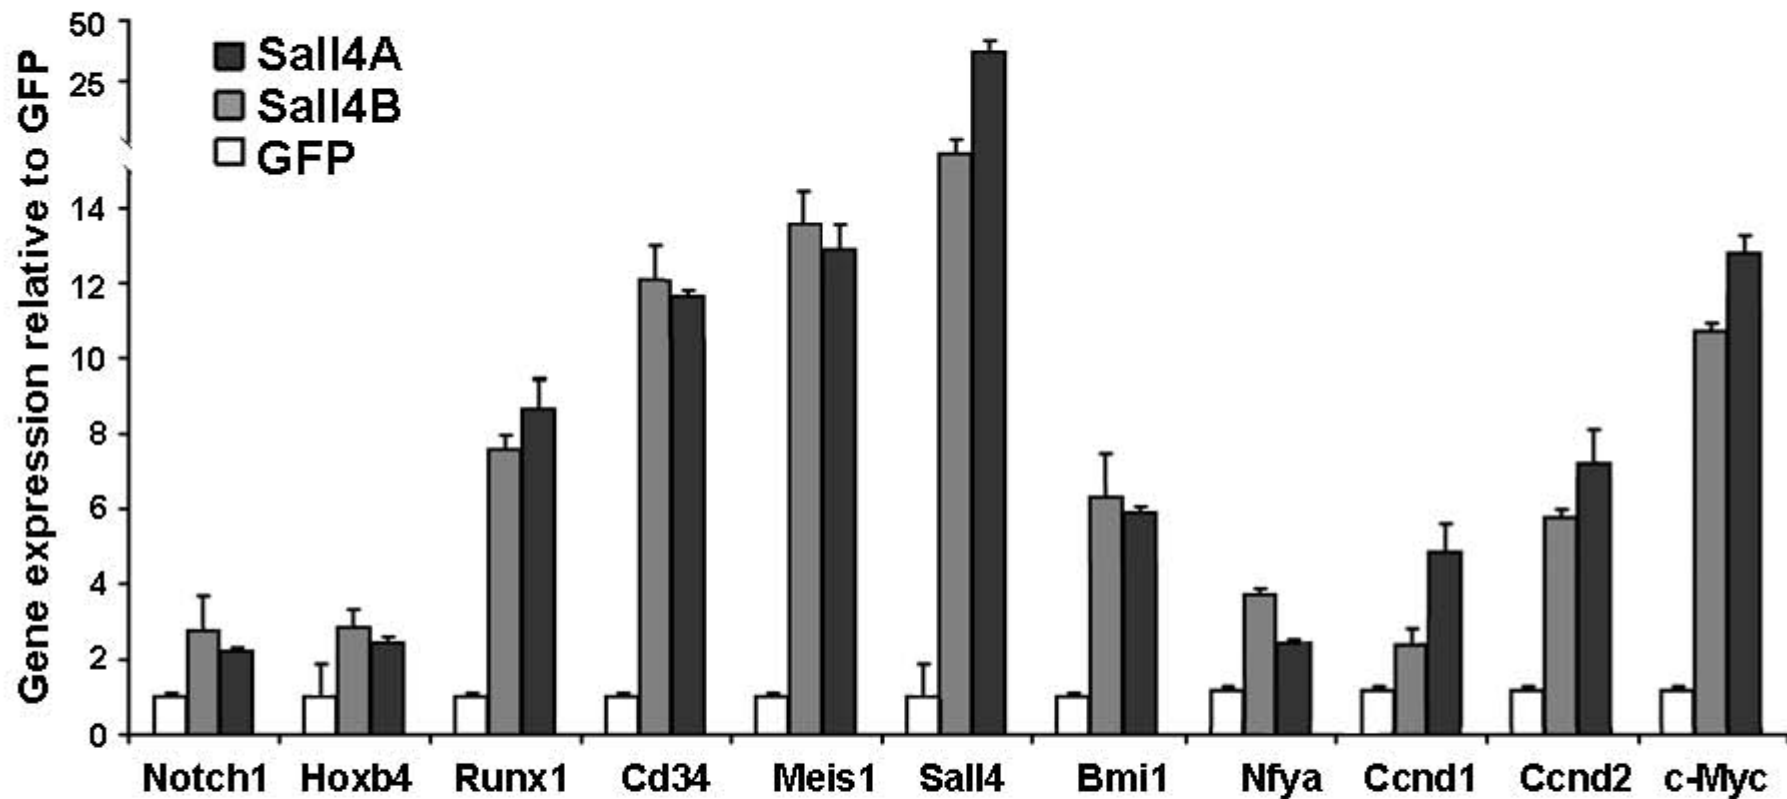

Supplement: MOESM11 [file 9660806]
